# Supplementary material for: Components and Public Health Impact of Population Growth in the Arab World
Source: PLoS One. 2015 May 18;10(5):e0124944. doi: 10.1371/journal.pone.0124944 (PMC4436256; doi:10.1371/journal.pone.0124944)
Supplement: S1 File — For details of Table 4 visit www.census.gov/hhes/fertility and for details of Table 5 visit www.census.gov/health. (XLSX) [file pone.0124944.s001.xlsx]

## Sheet: Sheet1
Region and Countries	1992			2002			2012			Region and Countries	1992-2002			2002-2012			1992-2012
	Male	Female	Total	Male	Female	Total	Male	Female	Total		Male	Female	Total	Male	Female	Total	Male	Female	Total
GCC countries										GCC countries
Bahrain	308668	229352	538020	410991	303840	714831	756746	491602	1248348	Bahrain	102323	74488	176811	345755	187762	533517	448078	262250	710328
Kuwait	788581	614140	1402721	1231230	852075	2083305	1555502	1090812	2646314	Kuwait	442649	237935	680584	324272	238737	563009	766921	476672	1243593
Oman	1177938	836628	2014566	1433251	1107827	2541078	1695541	1394609	3090150	Oman	255313	271199	526512	262290	286782	549072	517603	557981	1075584
Qatar	305635	157876	463511	465535	237852	703387	1496609	454982	1951591	Qatar	159900	79976	239876	1031074	217130	1248204	1190974	297106	1488080
Saudi Arabia	9543505	7517245	17060750	12469458	9804581	22274039	14516106	12018398	26534504	Saudi Arabia	2925953	2287336	5213289	2046648	2213817	4260465	4972601	4501153	9473754
UAE	1367343	688946	2056289	2428671	1129427	3558098	3650063	1664254	5314317	UAE	1061328	440481	1501809	1221392	534827	1756219	2282720	975308	3258028
Total	13491670	10044187	23535857	18439136	13435602	31874738	23670567	17114657	40785224	Total	4947466	3391415	8338881	5231431	3679055	8910486	10178897	7070470	17249367
West Asian Countries										West Asian Countries
Iraq	9017978	8850297	17868275	12144718	11859329	24004047	15765254	15363971	31129225	Iraq	3126740	3009032	6135772	3620536	3504642	7125178	6747276	6513674	13260950
Jordan	2024400	1846510	3870910	2522880	2379175	4902055	3307872	3201015	6508887	Jordan	498480	532665	1031145	784992	821840	1606832	1283472	1354505	2637977
Lebanon	1757868	1790164	3548032	1885265	1950198	3835463	2028869	2111420	4140289	Lebanon	127397	160034	287431	143604	161222	304826	271001	321256	592257
Syria	6800185	6511462	13311647	8805385	8494433	17299818	11444059	11086687	22530746	Syria	2005200	1982971	3988171	2638674	2592254	5230928	4643874	4575225	9219099
Yemen	7367146	7027604	14394750	9447134	9099069	18546203	12570205	12201604	24771809	Yemen	2079988	2071465	4151453	3123071	3102535	6225606	5203059	5174000	10377059
Total	26967577	26026037	52993614	34805382	33782204	68587586	45116259	43964697	89080956	Total	7837805	7756167	15593972	10310877	10182493	20493370	18148682	17938660	36087342
Maghreb Countries										Maghreb Countries
Algeria	13371113	13122516	26493629	15933892	15589819	31523711	17824975	17581328	35406303	Algeria	2562779	2467303	5030082	1891083	1991509	3882592	4453862	4458812	8912674
Libya	2253767	2056743	4310510	2713508	2531616	5245124	3443450	3290170	6733620	Libya	459741	474873	934614	729942	758554	1488496	1189683	1233427	2423110
Tunisia	4295262	4219214	8514476	4872526	4837695	9710221	5349943	5382957	10732900	Tunisia	577264	618481	1195745	477417	545262	1022679	1054681	1163743	2218424
Mauritania	987237	1055579	2042816	1268114	1363731	2631845	1617576	1741609	3359185	Mauritania	280877	308152	589029	349462	377878	727340	630339	686030	1316369
Morocco	12375903	12485175	24861078	14259385	14579510	28838895	15893168	16416071	32309239	Morocco	1883482	2094335	3977817	1633783	1836561	3470344	3517265	3930896	7448161
Total	33283282	32939227	66222509	39047425	38902371	77949796	44129112	44412135	88541247	Total	5764143	5963144	11727287	5081687	5509764	10591451	10845830	11472908	22318738
North East African Countries	</body>			</body>			</body>			North East African Countries
Comoros	221092	229635	450727	279876	294594	574470	357635	379649	737284		58784	64959	123743	77759	85055	162814	136543	150014	286557
Djibouti	267246	279839	547085	335890	380461	716351	357490	416899	774389	Djibouti	68644	100622	169266	21600	36438	58038	90244	137060	227304
Egypt	30589035	29168788	59757823	34643841	33379283	68023124	42378261	41309903	83688164	Egypt	4054806	4210495	8265301	7734420	7930620	15665040	11789226	12141115	23930341
Somalia	3097960	3018253	6116213	4008398	4008359	8016757	5063001	5022637	10085638	Somalia	910438	990106	1900544	1054603	1014278	2068881	1965041	2004384	3969425
Sudan	--	--		-	-					Sudan	#VALUE!	#VALUE!	0	#VALUE!	#VALUE!	0	#VALUE!	#VALUE!	0
Total	34175333	32696515	66871848	39268005	38062697	77330702	48156387	47129088	95285475	Total	5092672	5366182	10458854	8888382	9066391	17954773	13981054	14432573	28413627
Total Arabia	107917862	101705966	209623828	131559948	124182874	255742822	161072325	152620577	313692902	Total Arabia	23642086	22476908	46118994	29512377	28437703	57950080	53154463	50914611	104069074
